# Supplementary material for: Immunomodulatory Effects of Rhinovirus and Enterovirus Infections During the First Year of Life
Source: PubMed Central journal article supplement (PMC7905218; doi:10.3389/fimmu.2020.567046), 2021-02-11

## *Supplementary Material*

### **1 Supplementary Figures**

**Supplementary Figure 1.** Gating protocols are shown for the different regulatory T cell populations.

**Supplementary Figure 2.** Age-related changes in circulating T-cell phenotype related cytokines.

### **2 Supplementary Tables**

**Supplementary Table 1.** The primers and probes and the concentration of the oligonucleotides in the qPCR reactions

**Supplementary Table 2.** Product information on the reagents used in the study.

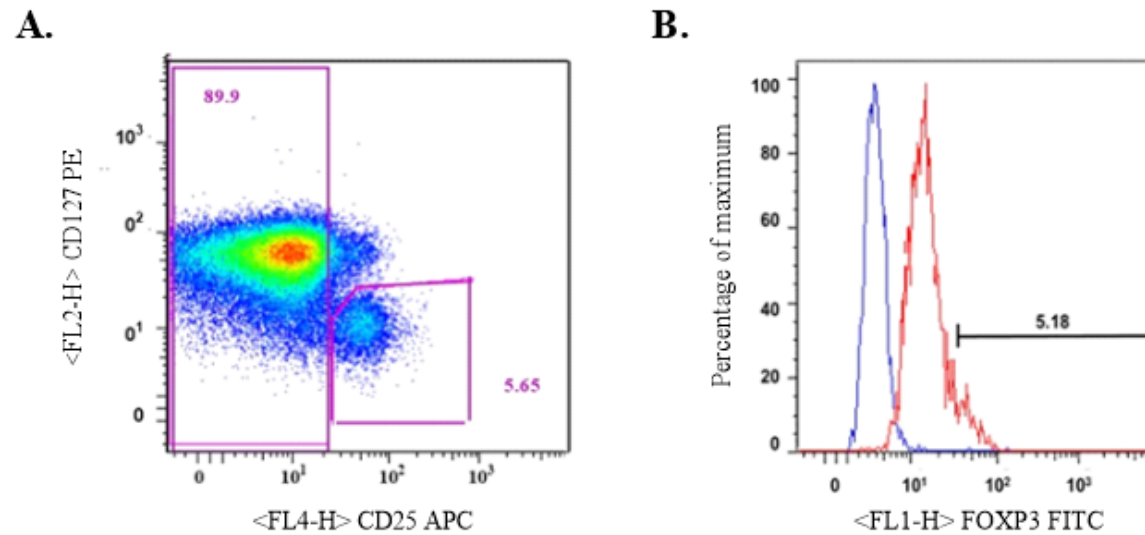

**Supplementary Figure 1.** Gating protocols are shown for the different regulatory T cell populations. (A) Regulatory T cells (Treg) in CD4+ are defined as CD25+CD127-/lo. Shown as the smaller gate at the lower right. (B) A histogram of FOXP3 fluorescence intensity demonstrates a population of Treg cells with a high expression of FOXP3 (TregFOXP3high) in the FOXP3 positive Treg cell population. The gate is shown as a horizontal line in the graph and the negative isotype control as a histogram on the left.

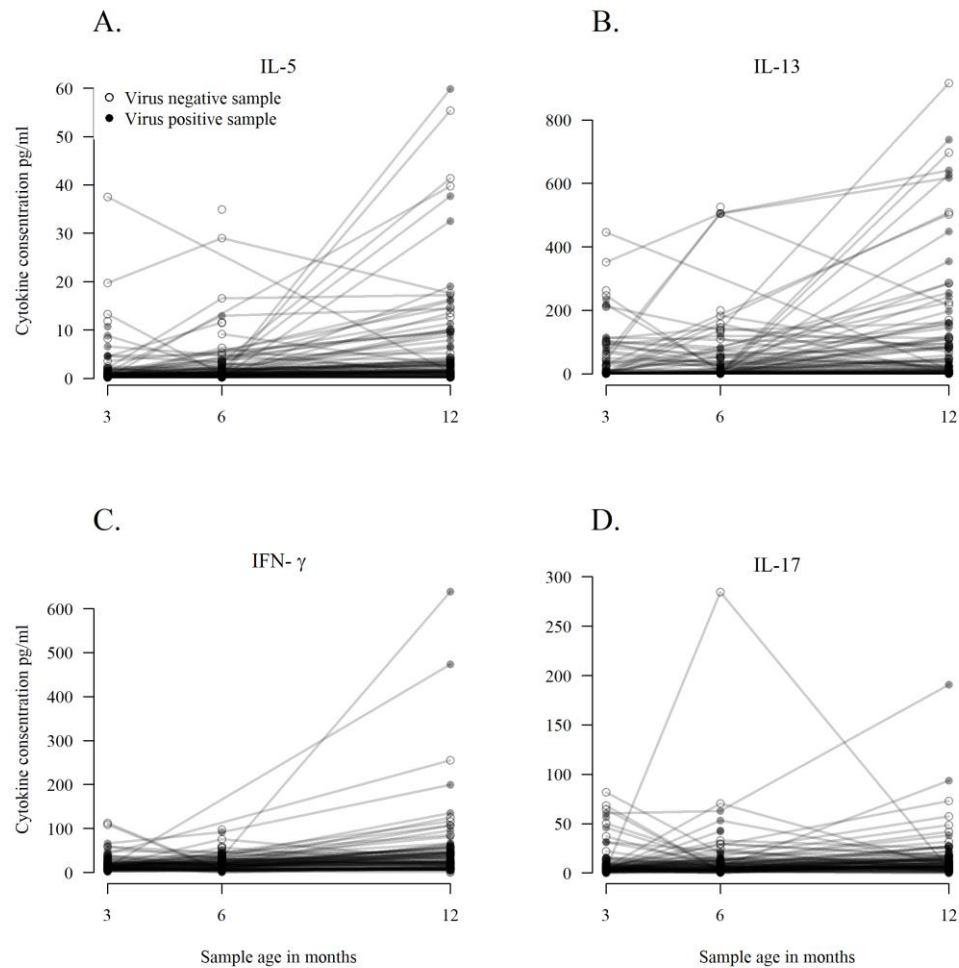

**Supplementary Figure 2.** Circulating T-cell phenotype related cytokines increase with age. The cytokine levels are shown for each infant. (A) IL-5, (B) IL13, (C) IFN $\gamma$ , and (D) IL17A. Black circles and lines represent virus positive samples, and open circles represent virus negative samples.

**Supplementary Table 1. The primers and probes and the concentration of the oligonucleotides in the qPCR reactions**

| <b>Virus</b> | <b>Primer name</b> | <b>Sequence</b>                           | <b>Concentration (<math>\mu</math>M)</b> |
|--------------|--------------------|-------------------------------------------|------------------------------------------|
| Enterovirus  | fwd 636            | CGGCCCTGAATGCGGCTAA                       | 900                                      |
|              | rev 4-             | GAAACACGGACACCCAAAGTA                     | 900                                      |
|              | Q-PCREVI           | FAM-TCTGTGGCGGAACCGACTA-TAMRA             | 300                                      |
|              | Q-PCREVII          | FAM-TCTGCAGCGGAACCGACTA-TAMRA             | 300                                      |
| Rhinovirus   | Rhinofwd           | CP+AGCC+TGCGTGGC                          | 900                                      |
|              | RhinoRev           | GAAACACGGACACCCAAAGTA                     | 900                                      |
|              | RhinoProbe         | VIC-TCCTCCGGCCCCTGAATGYGGC -TAMRA         | 300                                      |
| Norovirus    | NoroG2 fwdQ        | CARGARBCNATGTTYAGRTGGATGAG                | 900                                      |
|              | NoroG2 revQ        | TCGACGCCATCTTCATTCACA                     | 300                                      |
|              | NoroG1 revQ        | CTTAGACGCCATCATCATTYAC                    | 900                                      |
|              | NoroG1 fwdQ        | CGYTGGATGCGNTTYCATGA                      | 900                                      |
|              | NoroG2proQ         | FAM-TGGGAGGGCGATCGCAATCT-TAMRA            | 300                                      |
|              | NoroG1proQ         | VIC-AGATYGCGATCYCCTGTCCA- TAMRA           | 250                                      |
| Rotavirus    | VP2-F1             | TCTGCAGACAGTTGAACCTATTAA                  | 900                                      |
|              | VP2-F2             | CAGACACGGTTGAACCCATTAA                    | 900                                      |
|              | VP2-F3             | TCGGCTGATACAGTAGAACCTATAAATG              | 900                                      |
|              | VP2-F4             | TGTCAGCTGATACAGTAGAACCTATAAATG            | 900                                      |
|              | VP2-F5             | TCAGCTGACACAGTAGAACCTATA AATG             | 900                                      |
|              | VP2-R1             | GTTGGCGTTTACAGTTCGTTTCAT                  | 50                                       |
|              | VP2-R2             | GTTGGCGTCTACAATTCGTTTCAT                  | 50                                       |
|              | RotaVp2-P          | FAM-ATG CGC ATR TTR TCA AAH GCA A-MGB-NFQ | 200                                      |
| Parechovirus | ParE AN345         | GTAACASWWGCCTCTGGGSCCAAAG                 | 300                                      |
|              | ParE AN344         | GGCCCCWGRTCAGATCCAYAGT                    | 300                                      |
|              | ParE AN257         | FAM-CCTRYGGGTACCTYCWGGGCATCCTTC-TAMRA     | 200                                      |

**Supplementary Table 2. Product information on the reagents used in the study.**

| <b>Product</b>                                                     | <b>clone</b> | <b>Product code</b> | <b>Supplier</b>                         |
|--------------------------------------------------------------------|--------------|---------------------|-----------------------------------------|
| perCP-anti-human-CD4                                               | SK3          | 345770              | BD Biosciences, Franklin Lakes, NJ, USA |
| APC-anti-human-CD25                                                | M-A251       | 555434              | BD Biosciences, Franklin Lakes, NJ, USA |
| PE-anti-human-CD127                                                | HIL-7R-M21   | 557938              | BD Biosciences, Franklin Lakes, NJ, USA |
| Alexa-488-anti-human-FOXP3                                         | 206D         | 320111              | BioLegend, San Diego, CA, USA           |
| Alexa488-Mouse-IgG1-isotype                                        |              | 400133              | BioLegend, San Diego, CA, USA           |
| SPHERO™ Easy Calibration Fluorescent Particles, FITC               |              | ECFP-F1-5K          | Spherotech, Libertyville, IL, USA       |
| SPHERO™ Easy Calibration Fluorescent Particles, PE                 |              | ECFP-F2-5K          | Spherotech, Libertyville, IL, USA       |
| SPHERO™ Easy Calibration Fluorescent Particles, APC                |              | ACP30-5K            | Spherotech, Libertyville, IL, USA       |
| GE Healthcare's Ficoll-Paque density gradient                      |              | 17-1440-03          | Amersham Biosciences, Uppsala, Sweden   |
| FACS Lysing Solution                                               |              | 349202              | BD Biosciences, San Jose, CA            |
| FACSCalibur™                                                       |              |                     | BD Bioscience2                          |
| FlowJo™ software                                                   |              |                     | Tree Star, Ashland, OR, USA             |
| MILLIPLEX MAP Human Cytokine/Chemokine Magnetic bead 38-plex Panel |              | HCYTOMAG-60K        | Millipore, Billerica, MA, USA           |
| Bio-Rad Bio-Plex 200 System™                                       |              |                     | Bio-Rad Laboratories, Hercules, CA, USA |
| Bio-Plex Manager 5.0 program                                       |              |                     | Millipore, Billerica, MA, USA           |
| Graph Pad Prism 5 software                                         |              |                     | La Jolla, CA, USA                       |
| MagNaPure extraction robot                                         |              |                     | Roche Diagnostics, Mannheim, Germany    |
| Total Nucleic Acid extraction kit                                  |              |                     | Roche Diagnostics, Mannheim, Germany    |
| QuantiTect Probe kit                                               |              |                     | Qiagen, Germany                         |

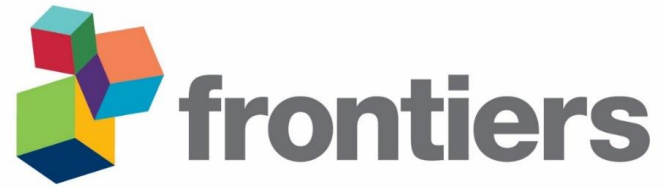

Supplement: DataSheet_1.pdf [file DataSheet_1.pdf]
